# Supplementary material
Source: ML conference proceedings conference paper supplement (https://openaccess.thecvf.com/content/CVPR2025/html/Xing_GoalFlow_Goal-Driven_Flow_CVPR_2025_paper.html)
Supplement: Supplementary file 1 [file Xing_GoalFlow_Goal-Driven_Flow_CVPR_2025_supplemental.zip]

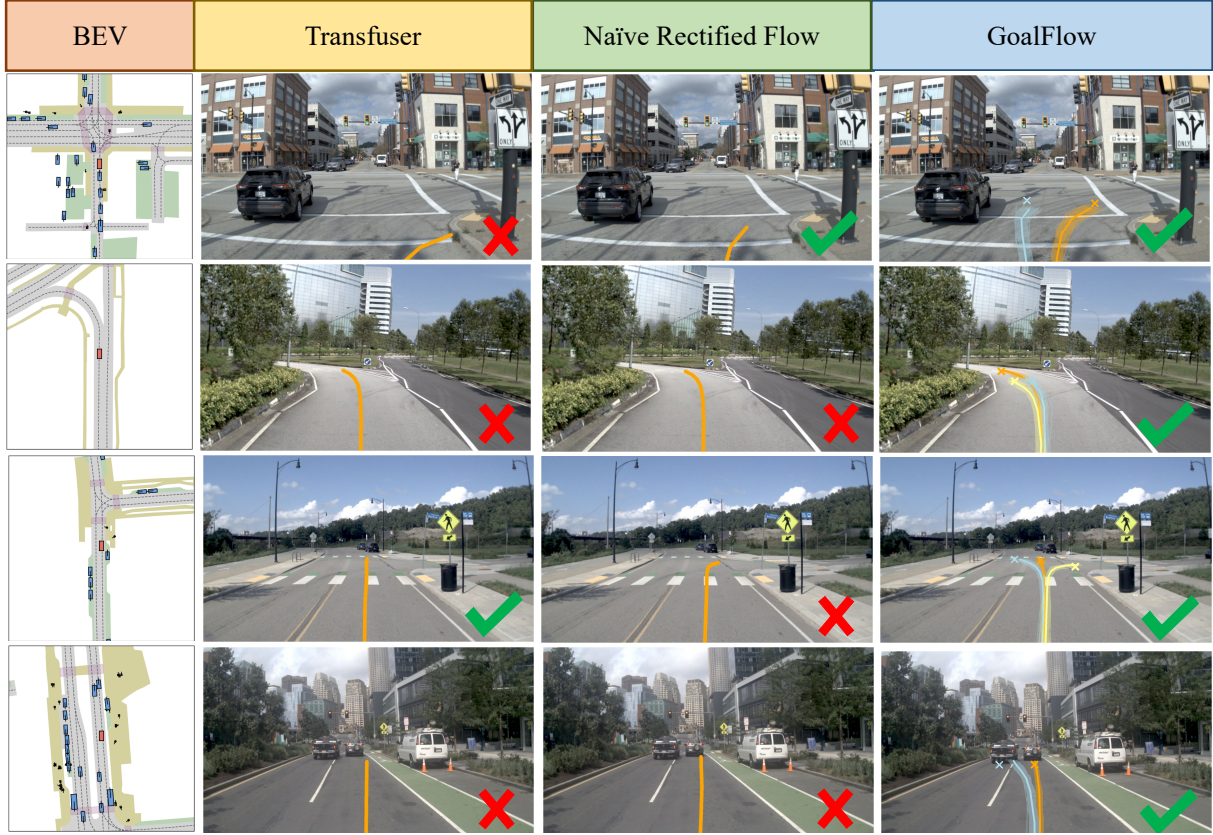

Figure 5. **Visualization of Trajectories.**  $\times$  indicates that the trajectory results in a collision or goes beyond the drivable area, while  $\checkmark$  represents a safe trajectory. The orange points are generated by the Goal Constructor, while the blue and yellow points correspond to samples from the vocabulary. The results highlight that GoalFlow generates higher-quality trajectories compared to the other two methods.

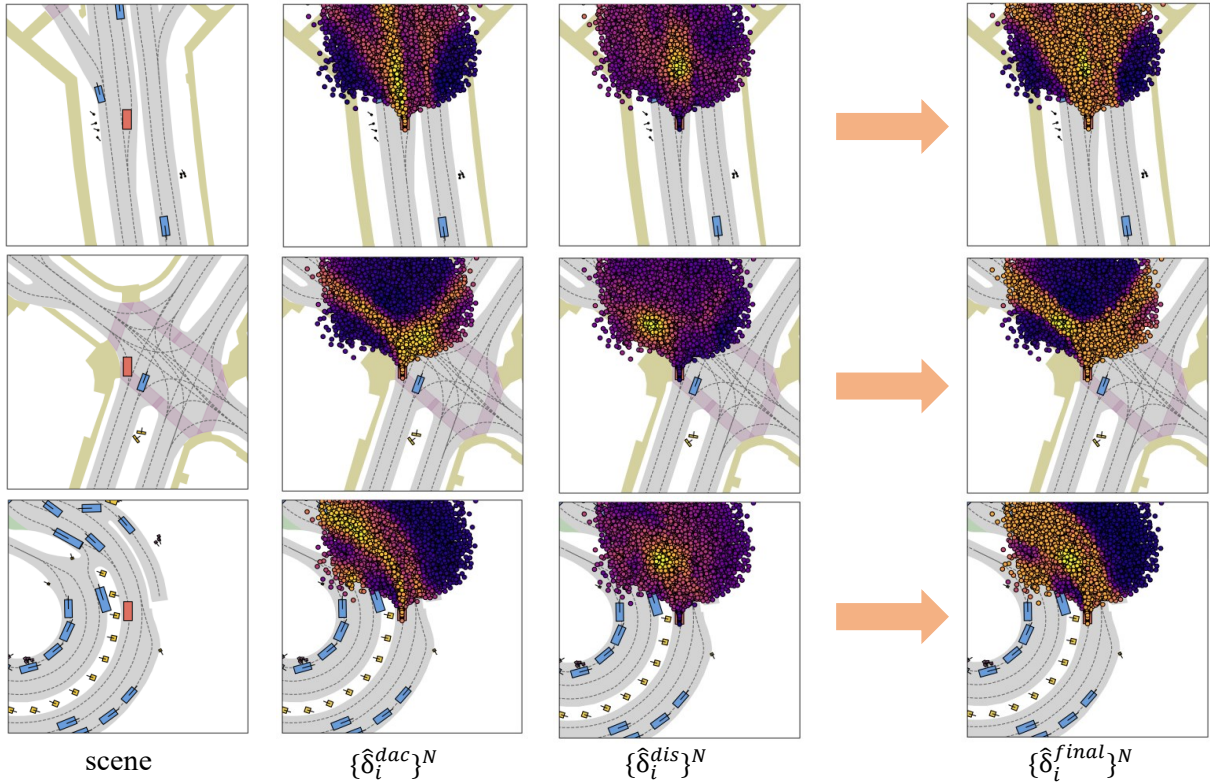

Figure 6. **Visualization of the goal point distribution.** The  $\hat{\delta}_i^{dac}$  score indicates whether a point is within the drivable area, while the  $\hat{\delta}_i^{dis}$  score reflects the distance relationship between the point and the goal. The final score  $\hat{\delta}_i^{final}$  is a fusion of the  $\hat{\delta}_i^{dac}$  and  $\hat{\delta}_i^{dis}$  scores, where points with higher brightness represent higher scores.

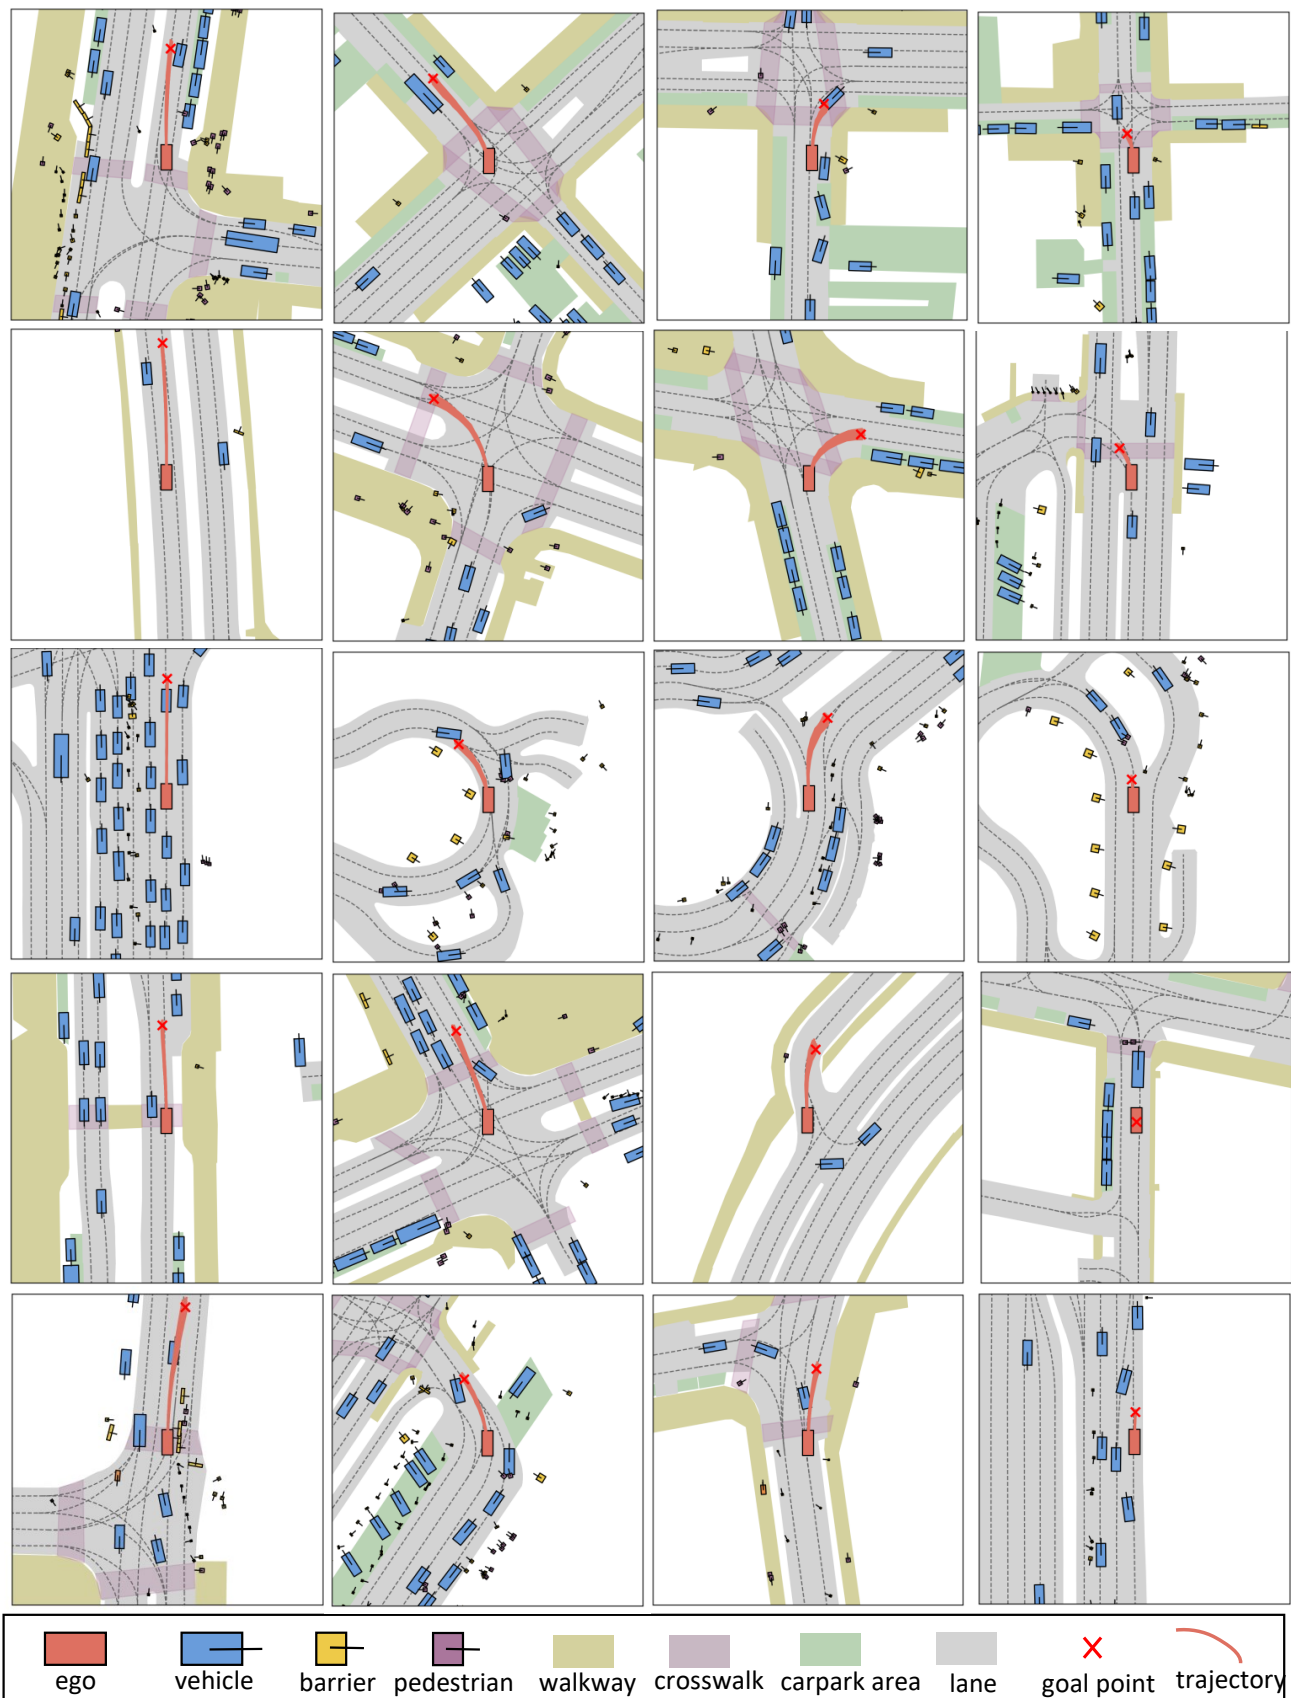

Figure 7. **Visualization of trajectories.** We visualize four scenarios: going straight, turning left, turning right, and yielding. For each scenario, 128 trajectories were generated using GoalFlow.
